# Supplementary material
Source: MDPI journal article supplement (https://www.mdpi.com/2073-4395/8/10/202)
Supplement: s1 [file s1]

# Supplementary Materials: Mitigation Potential and Yield-Scaled Global Warming Potential of Early-Season Drainage from a Rice Paddy in Tamil Nadu, India

Aung Zaw Oo, Shigeto Sudo, Kazuyuki Inubushi, Umamageswari Chellappan, Akinori Yamamoto, Keitsuke Ono, Masayoshi Mano, Sachiko Hayashida, Vanitha Koothan, Takeshi Osawa, Yukio Terao, Jothimani Palanisamy, Elayakumar Palanisamy and Ravi Venkatachalam

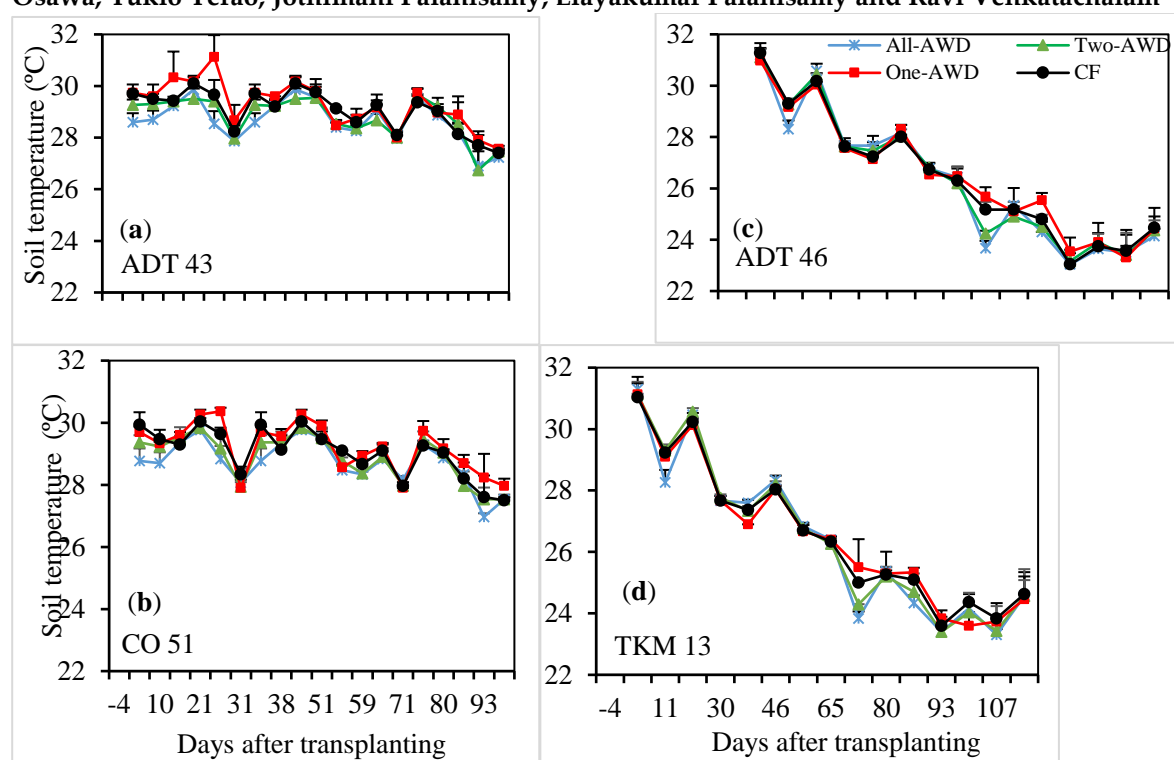

**Figure S1.** Variation in soil temperature during dry (a and b) and wet (c and d) rice growing seasons for different water management practices. Error bars indicate standard deviation ( $n = 3$ ). Full-AWD—wetting and drying cycles throughout the growing season, Two-AWD—two early drying periods, One-AWD—one early drying period, CF—continuous flooding.

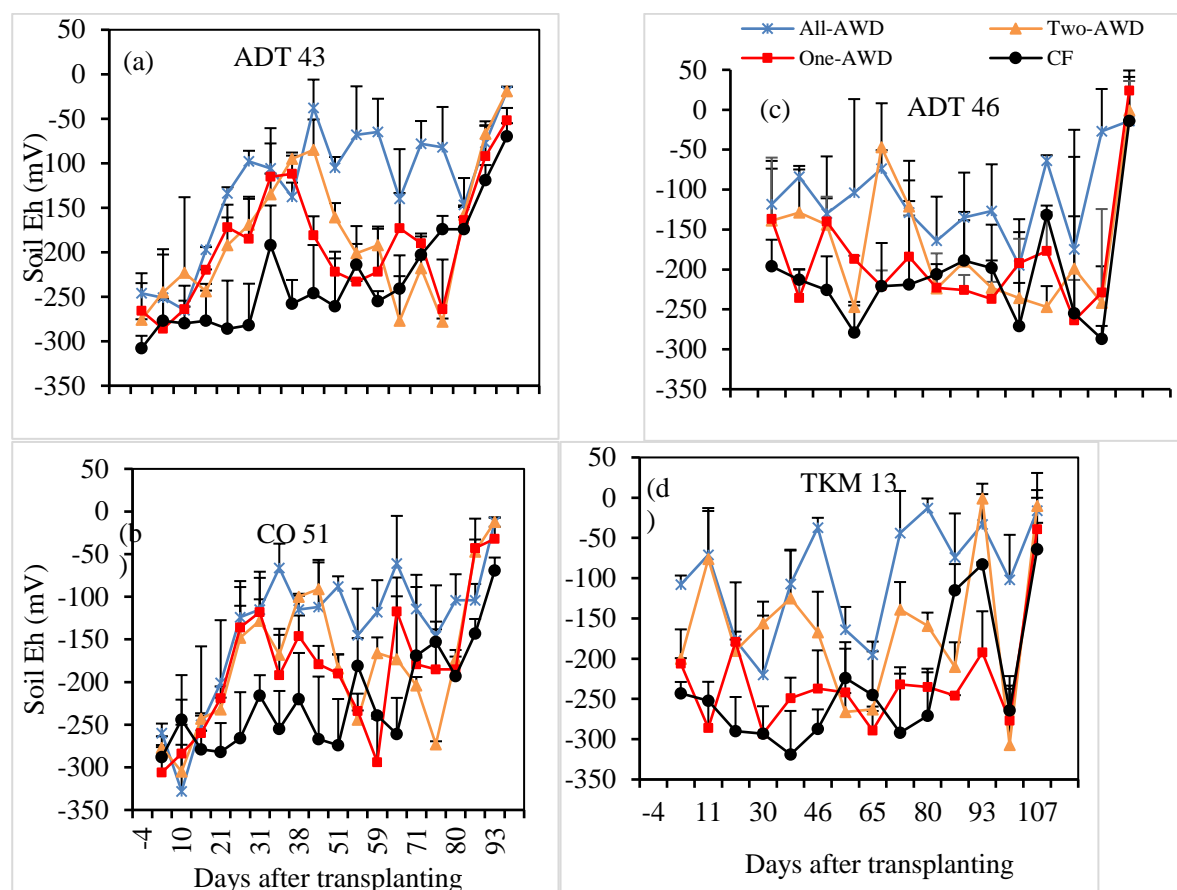

**Figure S2.** Variation in soil redox potential during dry (a and b) and wet (c and d) rice growing seasons for different water management practices. Error bars indicate standard deviation ( $n = 3$ ). Full-AWD—wetting and drying cycles throughout the growing season, Two-AWD—two early drying periods, One-AWD—one early drying period, CF—continuous flooding.
